# Supplementary material for: Thyroid Antagonists (Perchlorate, Thiocyanate, and Nitrate) and Childhood Growth in a Longitudinal Study of U.S. Girls
Source: PubMed Central journal article supplement (PMC4829993; doi:10.1289/ehp.1409309), 2015-07-07
Supplement: ehp.1409309.s001.acco.pdf [file ehp.1409309.s001.acco.pdf]

**Note to Readers:** *EHP* strives to ensure that all journal content is accessible to all readers. However, some figures and Supplemental Material published in *EHP* articles may not conform to 508 standards due to the complexity of the information being presented. If you need assistance accessing journal content, please contact [ehp508@niehs.nih.gov](mailto:ehp508@niehs.nih.gov). Our staff will work with you to assess and meet your accessibility needs within 3 working days.

## **Supplemental Material**

### **Thyroid Antagonists (Perchlorate, Thiocyanate, and Nitrate) and Childhood Growth in a Longitudinal Study of U.S. Girls**

Nancy A. Mervish, Ashley Pajak, Susan L. Teitelbaum, Susan M. Pinney, Gayle C. Windham,  
Lawrence H. Kushi, Frank M. Biro, Liza Valentin-Blasini, Benjamin C. Blount, and Mary S.

Wolff,<sup>1</sup> for the Breast Cancer and Environment Research Project (BCERP)

#### **Table of Contents**

**Table S1.** Three-year geometric mean of creatinine corrected perchlorate, nitrate, thiocyanate and iodide urine concentrations within surrogate sample determined exposure tertiles<sup>a</sup>.

**Table S1.** Three-year geometric mean of creatinine corrected perchlorate, nitrate, thiocyanate and iodide urine concentrations within surrogate sample determined exposure tertiles<sup>a</sup>.

| <b>Surrogate Sample</b>          | <b>Geometric mean (ug/g Creatinine)</b> |               |             |
|----------------------------------|-----------------------------------------|---------------|-------------|
|                                  | <b>Low</b>                              | <b>Medium</b> | <b>High</b> |
| <b>Perchlorate</b>               |                                         |               |             |
| Baseline                         | 3.33                                    | 4.11          | 5.87        |
| Year 1                           | 3.18                                    | 4.29          | 5.83        |
| Year 3                           | 3.07                                    | 4.58          | 5.67        |
| <b>Nitrate (mg/g creatinine)</b> |                                         |               |             |
| Baseline                         | 422                                     | 576           | 768         |
| Year 1                           | 422                                     | 593           | 746         |
| Year 3                           | 417                                     | 564           | 794         |
| <b>Thiocyanate</b>               |                                         |               |             |
| Baseline                         | 463                                     | 713           | 1067        |
| Year 1                           | 460                                     | 680           | 1100        |
| Year 3                           | 471                                     | 698           | 1048        |
| <b>Iodide</b>                    |                                         |               |             |
| Baseline                         | 127                                     | 195           | 324         |
| Year 1                           | 132                                     | 200           | 304         |
| Year 3                           | 129                                     | 210           | 295         |

<sup>a</sup>Analyses were conducted on data from 111 girls with three samples collected at baseline, 1 and 3 years after.

The concentration distribution of the 111 samples collected at each time point were used to create tertile cutpoints for assignment of each child into low, medium, or high exposure level. Mean concentrations (low, medium and high) were calculated using the three-year means of the individual children assigned to each exposure group (N $\cong$ 37). All calculations were performed on natural-log transformed data and were back transformed to obtain geometric means.
